# Supplementary material
Source: PubMed Central journal article supplement (PMC2268832)

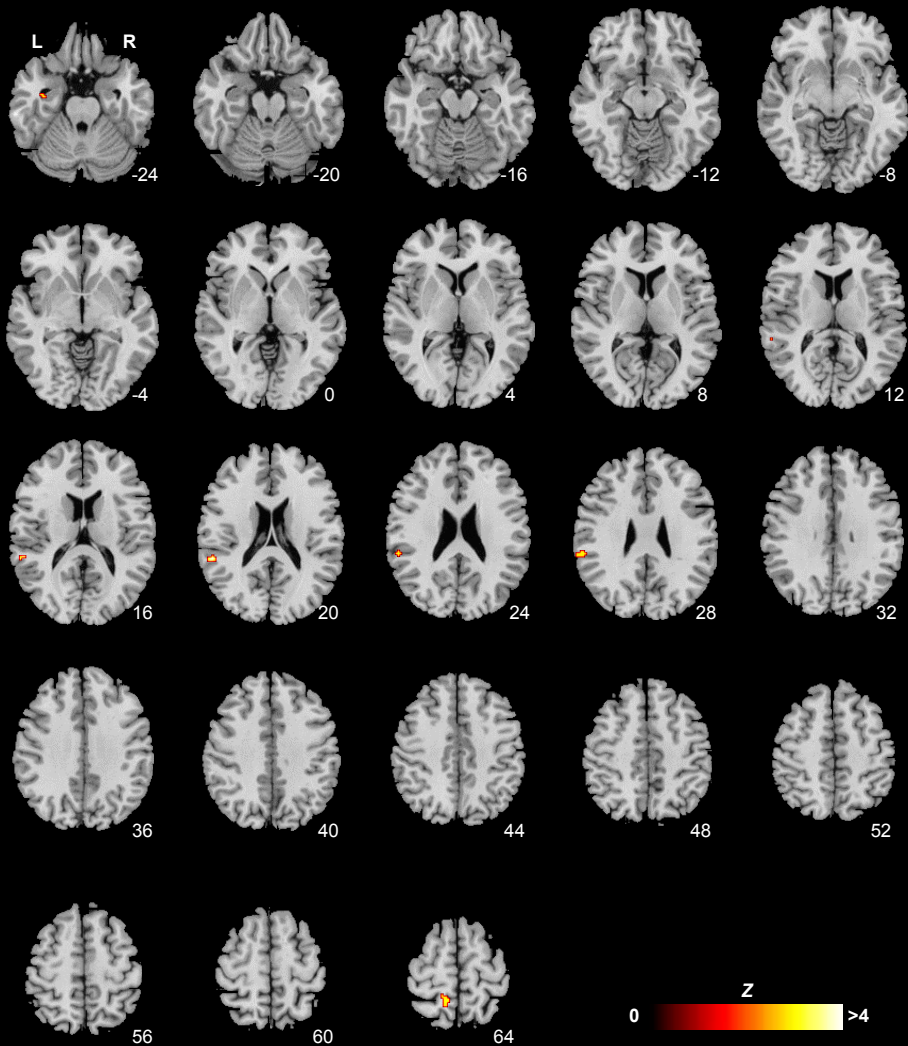

Supplement: pnas_0800055105_1.pdf [file pnas_0800055105_1.pdf]
